## **Salted roads lead to edema and reduced locomotor function in wood frogs**

Running title: Road salt and edema in frogs

Keywords: amphibian; bloating; freshwater salinization; pollution; road salt; runoff

Manuscript type: Primary research

The manuscript contains two multi-panel figures and one supplemental table.

Lauren E. Frymus<sup>1</sup>  
Debora Goedert<sup>2,3†</sup>  
Francisco Javier Zamora-Camacho<sup>2,4</sup>  
Peter C. Smith<sup>5</sup>  
Caroline J. Zeiss<sup>5</sup>  
Mar Comas<sup>6</sup>  
Timothy A. Abbott<sup>1</sup>  
Silvia P. Basu<sup>1</sup>  
Jason C. DeAndressi<sup>1</sup>  
Mia E. Forgione<sup>1</sup>  
Michael J. Maloney<sup>1</sup>  
Joseph L. Priester<sup>1</sup>  
Faruk Senturk<sup>1</sup>  
Richard V. Szeligowski<sup>1</sup>  
Alina S. Tucker<sup>1</sup>  
Mason Zhang<sup>7</sup>  
Ryan Calsbeek<sup>2</sup>  
Steven P. Brady<sup>1,\*</sup>

<sup>1</sup>Biology Department, Southern Connecticut State University. New Haven, CT 06501.

<sup>2</sup>Department of Biological Sciences, Dartmouth College, Hanover, NH 03755

<sup>3</sup>Ministry of Education of Brazil, CAPES Foundation, Brasilia, DF 95616, Brazil

<sup>4</sup>Department of Biodiversity, Ecology and Evolution. Complutense University of Madrid. C/José Antonio Novais 12, 28040, Madrid, Spain.

<sup>5</sup>Department of Comparative Medicine, Yale School of Medicine

<sup>6</sup>Department of Zoology, Sciences Faculty, University of Granada, 18071, Granada, Spain

<sup>7</sup>Amity Regional High School, Woodbridge, CT 06525

\* Submitting author ORCID: 0000-0001-6119-1363

---

† Present address: Centre for Biodiversity Dynamics, Department of Biology, Norwegian University of Science and Technology, NO-7491 Trondheim, Norway.

## 1 **Abstract**

2 Human activities have caused massive losses of natural populations across the globe. Like many groups,  
3 amphibians have experienced substantial declines worldwide, driven by environmental changes such as  
4 habitat conversion, pollution, and disease emergence. Each of these drivers is often found in close  
5 association with the presence of roads. Here we report a novel consequence of roads affecting an  
6 amphibian native to much of North America, the wood frog (*Rana sylvatica*). Across 38 populations  
7 distributed from southern to central New England, we found that adult wood frogs living adjacent to roads  
8 had higher incidence and severity of edema (bloating caused by fluid accumulation) during the breeding  
9 season than frogs living away from the influence of roads. This effect was best explained by increased  
10 conductivity of breeding ponds, caused by runoff pollution from road salt used for de-icing. Edema  
11 severity was negatively correlated with locomotor performance in more northerly populations.  
12 Interestingly, northern populations experience more intense winters, which tends to result in more de-  
13 icing salt runoff and increased energetic demands associated with overwintering cryoprotection needs.  
14 Thus, this emerging consequence of roads appears to impose potential fitness costs associated with  
15 locomotion, and these effects might be most impactful on populations living in regions where de-icing is  
16 most intense.

17

## 18 **Introduction**

19 Human activities are a leading driver of wild population declines, extirpations, and extinctions, culminating  
20 in the loss of global biodiversity (Ceballos et al. 2015, Leigh et al. 2019, Rosenberg et al. 2019). These  
21 losses shorten the branches of the tree of life and leave lasting if not permanent alterations to long-  
22 evolved interactions among species (Emer et al. 2019), modifying ecosystem function and the services  
23 they provide (Symstad et al. 1998, Cardinale et al. 2012).

24 Among the many groups of organisms declining across the globe, amphibians have captured a  
25 special place in the attention of researchers, fueling a surge in scientific inquiry over the past three  
26 decades (Green et al. 2020). Causes of declines in amphibian populations are complex and dependent  
27 on both regional context and species-specific adaptations, but unsurprisingly share a common theme of  
28 human activity (Grant et al. 2020). Drivers include habitat loss and alteration, pollution, climate change,

29 and disease. These and many other human-mediated drivers can act synergistically, confronting  
30 populations with conditions far exceeding the capacity of existing trait variation or the potential for  
31 adaptive evolutionary or plastic responses (reviewed in Green et al. 2020).

32 Lurking among the numerous drivers of amphibian declines lies a common but often overlooked  
33 thread: roads. The planet is swathed in some 64 million km of roads (Central Intelligence Agency 2013),  
34 with 25 million km more expected by 2050 (Dulac 2013). This vast network contributes an extensive and  
35 generally negative set of impacts on natural populations (Trombulak and Frissell 2000, Fahrig and  
36 Rytwinski 2009), even as some may be adapting (Brady and Richardson 2017). Perhaps most direct and  
37 apparent, roads result in huge numbers of road kill – dispatching up to 1 million vertebrates per day in the  
38 U.S. alone (Lalo 1987) – a phenomenon that disproportionately affects amphibians (Glista et al. 2008).  
39 Roads can facilitate the spread of both disease (Urban 2006) and invasive species (Mortensen et al.  
40 2009); they fragment habitats (Reed et al. 1996), reduce connectivity (Shepard et al. 2008), and affect  
41 dispersal and gene flow (Riley et al. 2006). Roads are also substantial sources of pollution. Leaching and  
42 stormwater runoff have deposited countless contaminants into the environment for decades (Huber et al.  
43 2016). Many contaminants can reach toxic levels in soil, surface waters, and groundwater (Marsalek et al.  
44 1999, Tang et al. 2013, McIntyre et al. 2018), and these effects can extend to habitats located well  
45 beyond the road (Forman and Deblinger 2000). Some contaminants are fleeting, broken down by  
46 chemical or biological processes, but others are long-lived or inert and tend to increase over time  
47 (Kaushal et al. 2005). In short, this singular and physically narrow change to the landscape caused by  
48 roads spurs numerous and wide-reaching drivers of population decline. Identifying and understanding  
49 these drivers and their effects is essential for conservation efforts.

50 In areas with cold winters, a chief pollutant threatening amphibian populations is road salt. Due to  
51 de-icing practices and the pervasiveness of roads, salt pollution of surface and groundwaters has become  
52 common and widespread (Mullaney et al. 2009, Corsi et al. 2010). Even in large waterbodies (e.g.,  
53 permanent ponds, lakes), runoff pollution can result in substantial salt concentrations exceeding national  
54 water quality criteria for aquatic life (Dugan et al. 2017, Kaushal et al. 2018). In smaller waterbodies  
55 however (e.g., vernal pools, wetlands), levels can be many times higher, approaching brackish conditions  
56 typical of coastal waters, a stark contrast to the generally salt-free conditions of small, inland surface

57 waters. For many pool-breeding amphibians, these smaller waters are critical sites for reproduction,  
58 where embryos and larvae develop before metamorphosing and dispersing into terrestrial habitats.  
59 Across the complex life-history cycle common to many amphibians, sensitivity to salt tends to be highest  
60 for embryos and larvae (Gordon and Tucker 1965, Uchiyama et al. 1990, Karraker et al. 2008, Albecker  
61 and McCoy 2017). Thus, pool-breeding amphibians tend to face salt pollution at peak sensitivity, and this  
62 timing often coincides with annual peaks in salt concentration that occur after winter. At high enough  
63 concentrations, salt causes outright mortality in amphibians (Sanzo and Hecnar 2006, Brady et al. 2017).  
64 At lower concentrations, sublethal effects are numerous. Aquatic-stage exposure to salt affects behavior  
65 (Denoël et al. 2010) and modifies growth and developmental rates (Dananay et al. 2015, Brady 2017), it  
66 increases malformations and susceptibility to disease (Karraker and Ruthig 2009, Brady 2013, Hall et al.  
67 2020), and it causes ‘carry-over’ effects, negatively impacting post-metamorphic survival in the terrestrial  
68 environment (Dananay et al. 2015); all of which can contribute to observed population declines (e.g.,  
69 Karraker et al. 2008).

70 In the present study, we investigated an additional and novel physiological consequence of roads:  
71 severe gross edema found in adult frogs breeding in polluted, roadside ponds. Although edema is  
72 recognized as a disorder in veterinary and disease literature (e.g., Hadfield and Whitaker 2005, Miller et  
73 al. 2011), its occurrence and causes in natural amphibian populations have been overlooked (but see Hall  
74 et al. 2017). For the wood frog (*Rana sylvatica*) – the focus of our study – temporary edema can be found  
75 among breeding adults in early spring, apparently resulting naturally from overwintering physiology.  
76 During spring thaw, the reversal of the process whereby water is sequestered out of cells to prevent intra-  
77 cellular ice formation, is thought to cause temporary edema (Kling et al. 1994, Irwin et al. 1999). However,  
78 our preliminary observations suggest that spring edema is more severe in populations from polluted,  
79 roadside ponds compared to those from unpolluted, woodland ponds.

80 Here, we quantified the severity of edema in wood frogs from 38 ponds in New England, where  
81 road salt pollution is common. We posited that road salt might be causing severe edema, and therefore  
82 asked whether variation in edema prevalence and severity correlates with road adjacency and water  
83 conductivity, and if edema prevalence and severity increases with age, a proxy for lifetime exposure. We  
84 also investigated directly the effect of roadside pond water on edema by estimating body mass gain for

85 animals exposed to water from roadside versus woodland ponds and compared to spring water. Next, we  
86 used dissections and histological preparations to characterize the relation between edematous outward  
87 appearance and potential underlying signs and causes. Since edema could be associated with winter  
88 physiology and spring thaw, we also asked if blood glucose levels correlated with edema severity. Finally,  
89 we investigated a potential fitness cost of edema. Specifically, we asked how jumping performance, a  
90 commonly used fitness proxy for frogs, is affected by edema severity.

91

## 92 **Methods**

### 93 *Natural history*

94 Wood frogs are widespread in North America, ranging in distribution from the eastern southern  
95 Appalachian Mountains and extending north- and westward to the Alaska-Yukon region within the Arctic  
96 circle (Martof and Humphries 1959, Green et al. 2014). To survive winter conditions, particularly in higher  
97 latitudes, wood frogs rely on physiological adaptations to freezing (Storey and Storey 1988, Costanzo et  
98 al. 2015). Wood frogs typically use ephemeral or other small, fishless ponds for breeding in early spring.  
99 Across our study area, breeding occurs typically between early March and mid-April, lasting about 1-2  
100 weeks in any given pond. Immediately prior to breeding, adults migrate from upland terrestrial habitat to  
101 mate in ephemeral ponds. Males amplex females and fertilize eggs externally during oviposition. Each  
102 female lays a single clutch as an egg mass containing approximately 800–1100 eggs. Embryos develop  
103 over 2–3 weeks before hatching and continue to develop as aquatic larvae throughout spring and early  
104 summer until they metamorphose into terrestrial juveniles, which disperse into upland habitat. Adults can  
105 live for 5-6 years (Berven 2009, Brady et al. 2019), and apart from annual breeding, tend to spend most  
106 of their lives in terrestrial habitat. Juvenile wood frogs show strong natal site fidelity and, as adults, strong  
107 breeding site fidelity (Berven and Grudzien 1990).

108

### 109 *Edema severity/prevalence and environmental variation*

110 We quantified edema by compiling data for 935 individual frogs from 38 breeding ponds (putative  
111 populations, referred interchangeably as “populations” hereafter) in New England (N=20 roadside, 18  
112 woodland; Fig. 1). Following Brady (2013), ponds were categorized as either ‘roadside’ (< 10-15 m from a

113 paved road) or 'woodland' (> 150 m from any road). Frogs were captured during four breeding seasons in  
114 three different study areas (spanning from 41.2-43.8 degrees North), each containing a mix of roadside  
115 and woodland populations: 1) Southern Connecticut (N=9 roadside, 9 woodland ponds in 2018), 2)  
116 Northeastern Connecticut (N=6 roadside, 5 woodland ponds in 2010), and 3) the Upper Valley of Vermont  
117 and New Hampshire (N=5 roadside, 4 woodland ponds in 2016 and 2017). In Northeastern Connecticut,  
118 frogs were captured on their inbound breeding migration using drift fences with pitfall traps placed  
119 adjacent to breeding ponds. Frogs from these populations were therefore not exposed to pond water  
120 immediately prior to capture. In the other two study areas, drift fences with pitfalls were supplemented  
121 with minnow traps. Thus, frogs from these populations had mixed histories of exposure to pond water  
122 immediately before capture. Both types of traps were checked daily for new captures. Captured frogs  
123 were returned to the lab and dorsal photographs were taken within two days. Edema severity was scored  
124 from these photographs on a 1-3 integer scale, corresponding to 1) non-edematous, 2) moderate edema,  
125 and 3) severe edema. For the analysis of prevalence, an individual was considered edematous if it had  
126 an edema score of either 2 or 3. The following environmental variables were measured during the spring  
127 breeding / rearing seasons in a subset of ponds: specific conductivity (N=31 ponds), dissolved oxygen  
128 (N=29 ponds), and pH (N=18 ponds).

129         We used separate mixed models to evaluate the effect of population type (roadside vs. woodland)  
130 on 1) edema severity score and 2) edema prevalence. Edema severity was fit using a linear model with a  
131 Gaussian distribution while edema prevalence was fit using a binomial model with a logit link. In each  
132 case, we first used AIC model selection to compare three candidate models fit with maximum likelihood  
133 and the following random effect structures: population, population and region (i.e. Southern Connecticut,  
134 Northeastern Connecticut, or Upper Valley of Vermont and New Hampshire), and population nested  
135 within region. Using a threshold for delta AIC value of 2, the model with the single random effect of  
136 population was preferred for both edema severity and prevalence. Fixed effect inference of severity was  
137 made after refitting the selected model with restricted maximum likelihood estimation. Here and  
138 elsewhere when linear mixed models were used, p-values were based on degrees of freedom calculated  
139 with Satterthwaite's approach implemented in the R package 'lmerTest' (Kuznetsova et al. 2017).  
140 Because our edema severity data could potentially be considered ordinal, we also composed a mixed

141 model using the R package 'ordinal' (Christensen 2019). Inference was similar between these two  
142 modeling approaches ( $P < 0.001$  in each case) and we therefore interpreted results from the linear model.  
143 For the binomial responses of prevalence, inference was made using a likelihood ratio test between the  
144 selected model and a reduced model in which the response mean was used as the sole fixed effect in  
145 place of population type (i.e. intercept-only model). In a separate suite of standard linear models, we  
146 analyzed edema in response to conductivity, dissolved oxygen, and pH. Pond-level averages of edema  
147 score were used as the response variable in each model. Conductivity was log-transformed because of  
148 its wide range (26-984  $\mu\text{S}/\text{cm}$ ) and bimodal distribution between woodland and roadside ponds.

149 We analyzed the relation between adult age and both edema severity and prevalence using data  
150 from 74 individuals collected in 2014 from 9 populations (N=4 roadside, 5 woodland) in the Upper Valley  
151 of Vermont and New Hampshire. Individuals used in this analysis were collected during the inbound  
152 breeding migration (prior to arriving at ponds) using drift fences with pitfall traps. Edema was estimated  
153 from photos as described above and age was estimated using skeletochronology of toe clips (methods  
154 described in Brady et al. 2019). We used a linear model with either prevalence or severity as the  
155 response variable, and the interaction between age and population type for fixed effects.

156

### 157 *Exposure-induced change in mass*

158 We examined the effects of pond water exposure on adult wood frog water uptake, a potential cause of  
159 edema. We analyzed data from a prior study conducted in the same Northeastern CT populations,  
160 designed originally to test the effects of early-embryo exposure to polluted pond water on larval survival  
161 (see Brady 2017). Briefly, adult frogs were captured during the breeding season using drift fences with  
162 pitfall traps adjacent to breeding ponds. All frogs were captured on their inbound migration and thus were  
163 not yet exposed to breeding pond water at the time of capture. At each breeding pond, captured frogs  
164 were measured for snout-vent length (SVL) and weighed prior to being paired haphazardly to breed in 5.1  
165 L plastic aquaria filled with 1 L of either breeding-pond water or spring water. For roadside populations,  
166 this design resulted in approximately half the treatments being roadside water and the other half being  
167 spring water. For woodland populations, about half the treatments were woodland pond water and the  
168 other half were spring water. Across 11 ponds (N=6 roadside, 5 woodland), an average of 8.5 (range: 4-

169 14) breeding pairs were stocked into each treatment (i.e. breeding-pond water or spring water). Exposure  
170 period was determined by the time required to breed. Following breeding, adults were re-weighed.

171 We analyzed change in body mass relative to SVL for males prior to and after breeding. Females  
172 were excluded from this analysis because change in mass caused by water is confounded with change in  
173 mass due to oviposition. Specifically, we calculated a body condition index (BCI) as mass per unit SVL  
174 (i.e. mass/SVL), both before and after exposure to pond or spring water that occurred while breeding. We  
175 then calculated delta BCI as the ratio of post-breeding BCI to pre-breeding BCI. Thus, delta BCI values >  
176 1 indicate body mass gain whereas those < 1 indicate body mass loss. We used separate linear mixed  
177 models with population as the random effect to analyze both delta BCI and exposure duration across the  
178 interaction of population type and exposure water type. We used the R package 'emmeans' (Lenth et al.  
179 2018) to estimate marginal means for each of these models and to compute 95% confidence intervals  
180 with respect to a null value of 1 (i.e. no change in body mass). We applied Tukey contrasts to make  
181 pairwise comparisons of both delta BCI and exposure duration across this interaction.

182

### 183 *Morphology, histology and blood glucose*

184 In spring 2020, we necropsied six frogs from Southern Connecticut populations (N=1 with severe edema,  
185 N=5 non-edematous, all male) to identify the underlying source of edema and to evaluate potential  
186 changes in gross morphology associated with edema. Following prosection and gross dissection, soft  
187 tissues (including gastrointestinal tract, liver, spleen, kidneys, lung, heart, reproductive tissues and  
188 remainder of body) were fixed in 10% neutral buffered formalin, while long bones, associated muscle,  
189 nerve and skin, as well as brain and eyes (in skull), were fixed in Bouin's solution for one week. Tissues  
190 were processed using standard paraffin processing sectioned at 5  $\mu$ m, and stained with hematoxylin and  
191 eosin for light microscopic evaluation. Images were taken with a Zeiss Axioskop and Zeiss AxioCam MRC  
192 camera. We also measured blood glucose in subset of 54 male frogs from 6 roadside ponds (N = 35  
193 frogs) and 4 woodland ponds (N = 19 frogs) in Southern Connecticut. We obtained a blood sample using  
194 a 30.5 gauge needle to pierce the facial vein (Forzán et al. 2012). A drop of blood was then placed on a  
195 testing strip and assayed using a Bayer Contour® Next blood glucose meter. We used a mixed model  
196 with population as a random effect to analyze blood sugar in response to edema and population type. We



197 included body mass as a covariate in this analysis because of its potential effect on blood glucose  
198 irrespective of edema related to pollution. The two highest blood glucose observations were removed  
199 from analysis because they were 12 and 6.8 times the median absolute deviation.

200

### 201 *Jumping performance*

202 To evaluate whether jumping performance might be compromised by edema, we conducted jump trials on  
203 a subset of frogs scored for edema from Southern Connecticut (N = 270 in 2019) and the Upper Valley of  
204 Vermont and New Hampshire (N = 258 in 2016 and 2017). Frogs were placed on one end of a 0.91 X 5 m  
205 piece of brown paper and at least 5 consecutive jumps were recorded, or frogs were placed between two  
206 plastic walls (height: 34 cm; length: 3.4 m) separated by approximately 30 cm, such that frogs could only  
207 jump forward. Frogs were motivated to jump as needed by tapping their urostyle with a finger (Brady et al.  
208 2019). Marks were placed where frogs landed and the maximum distance between marks was recorded.  
209 We used a mixed model with population as the random effect to analyze the relation between jumping  
210 performance and edema. For each frog, we used maximum jump distance from among all jumps in a  
211 given trial as the response variable. We analyzed jump performance collectively and separately for the  
212 two regions. We also used a mixed model with population as the random effect to analyze whether jump  
213 performance varied between the two regions.

214

## 215 **Results**

### 216 *Edema severity/prevalence and environmental variation*

217 Across 38 ponds, edema was more severe and more prevalent in roadside than woodland ponds (Fig. 1).  
218 Specifically, model estimates of edema score were 1.84 in roadside ponds compared to 1.46 in woodland  
219 ponds ( $F_{1,30.0} = 14.77$ ,  $P < 0.001$ ). Variance between ponds (regardless of type) estimated from the  
220 random effect accounted for 12.3% of total edema severity variance. The probability of finding edema in  
221 roadside ponds was estimated at 0.605 compared to 0.367 in woodland ponds. Edema was therefore  
222 65% more prevalent in roadside versus woodland ponds. Among environmental variables, edema  
223 severity was correlated with log-transformed conductivity ( $F_{1,29} = 17.72$ ,  $P < 0.001$ ; Fig 1) but not pH ( $F_{1,16}$   
224  $= 0.603$ ,  $P = 0.45$ ) or dissolved oxygen ( $F_{1,27} = 0.00$ ,  $P = 0.996$ ). Conductivity averaged 545  $\mu\text{S}/\text{cm}$  in

225 roadside ponds (range: 170-984  $\mu\text{S}/\text{cm}$ ), representing a 14-fold increase over the average 38  $\mu\text{S}/\text{cm}$   
226 (range: 26-53) found in woodland ponds ( $F_{1,29} = 38.57$ ,  $P < 0.001$ ).

227 Neither edema severity ( $X^2 = 0.146$ ,  $\text{df} = 1$ ,  $P = 0.702$ ) nor prevalence ( $X^2 = 0.01$ ,  $\text{df} = 1$ ,  $P =$   
228 0.921) varied across the interaction of age and population type. Similarly, when main effects were  
229 considered, we found no effect of age or population type on edema severity (age:  $F_{1,71} = 1.85$ ,  $P = 0.178$ ;  
230 population type:  $F_{1,71} = 0.207$ ,  $P = 0.651$ ) or prevalence (age:  $X^2 = 0.957$ ,  $\text{df} = 1$ ,  $P = 0.328$ ; population  
231 type:  $X^2 = 0.003$ ,  $\text{df} = 1$ ,  $P = 0.958$ ).

232

### 233 *Exposure-induced change in mass*

234 Delta BCI, or the change in body mass relative to SVL, varied across the interaction of water type X  
235 population type (Fig. 2;  $F_{1,339.3} = 18.02$ ,  $P < 0.001$ ). Specifically, wood frogs exposed to roadside water  
236 had the highest relative change in mass compared to those in all other treatments. Model estimates  
237 indicated that roadside wood frogs exposed to roadside water maintained their mass, whereas wood  
238 frogs in all other combinations of water and population type lost mass (Supplemental Table 1). The mean  
239 duration of exposure was 5.94 days (range of 1-13 days) and differed across the interaction of water type  
240 X population type ( $F_{1,290.23} = 3.97$ ,  $P = 0.047$ ). Tukey post-hoc pairwise comparisons revealed that the  
241 only difference in exposure time was between woodland populations in woodland water versus spring  
242 water ( $P = 0.026$ ; woodland populations exposure duration: 5.91 days for woodland pond water compared  
243 to 4.96 days for spring water; all other pairwise comparisons:  $P > 0.505$ ), indicating differences in  
244 exposure time did not drive the effect found in delta BCI for roadside populations.

245

### 246 *Morphology, histology and blood glucose*

247 On gross examination, marked subcutaneous edema was evident in the frog with severe edema (Fig. 2).  
248 Upon dissection, edema fluid rapidly dissipated from the subcutis, and was evident to a much lesser  
249 degree in the coelomic cavity. In all frogs, the gastrointestinal tract was devoid of ingesta or digesta, no  
250 fat stores were present, and testes were well developed. On histology, the grossly edematous animal  
251 exhibited subcutaneous edema. Adipose tissue was absent, and bone marrow was characterized by  
252 marked serous fat atrophy (or 'gelatinous bone marrow transformation') a condition associated with

253 starvation and characterized by loss of both fat and red-blood stem ('hematopoietic') cells, and the  
254 deposition of extracellular mucous (Fig. 2). In contrast, grossly non-edematous animals had absent or  
255 mild subcutaneous edema and greater retention of intact adipocytes within bone marrow. Remaining  
256 tissues were unremarkable, with the exception of a trematode segment characterized by an acoelomic  
257 body, tegument and intestinal tract within the liver on a non-edematous animal. This was considered an  
258 incidental finding. In all animals, spermatogenesis was vigorous.

259 Blood glucose varied with respect to edema severity ( $F_{1,43.8} = 7.00$ ,  $P = 0.011$ ) and body mass  
260 ( $F_{1,27.4} = 5.06$ ,  $P = 0.033$ ) but not population type ( $F_{1,10.0} = 0.05$ ,  $P = 0.831$ ). When accounting for  
261 population type and mass, along with random effects of population, blood glucose increased 13.16 mg/dL  
262 with each one-unit increase in edema score and decreased 4.2 mg/dL for each gram of body mass.

263

#### 264 *Jumping performance*

265 When all populations from the two regions with jumping data were analyzed together, edema was not  
266 correlated with maximum jumping distance in (male) frogs ( $F_{1,183.2} = 0.278$ ,  $P = 0.097$ ). However, separate  
267 analyses for each region revealed that edema negatively affected maximum jump distance for frogs in the  
268 Upper Valley ( $F_{1,131} = 4.92$ ,  $P = 0.016$ ) but not for frogs in Southern Connecticut ( $F_{1,199.4} = 0.50$ ,  $P =$   
269  $0.479$ ). Specifically, maximum jump distance for Upper Valley frogs declined by 4.3 cm for each unit  
270 increase in edema. Thus, on their best jumps, the frogs with severe edema jumped approximately 9 cm  
271 less than non-edematous frogs. Jumping performance also varied between regions independent of  
272 edema ( $F_{1,11.7} = 71.05$ ,  $P < 0.001$ ). Southern Connecticut frogs jumped an estimated 71 cm compared to  
273 49 cm for Upper Valley frogs. Thus, maximum jump for Upper Valley frogs was about 68% that of  
274 Southern Connecticut frogs.

275

#### 276 **Discussion**

277 Edema was both more prevalent and more severe in roadside populations subject to salt runoff compared  
278 to unsalted woodland populations across three different regions in the northeastern USA. In support of  
279 salt runoff being a causative agent of edema, we found that edema severity was correlated with  
280 conductivity in breeding ponds, and that frogs experimentally exposed to roadside pond water during

281 breeding increased fluid retention. Edema also correlated with increased blood glucose, as well as with  
282 decreased jumping performance in northerly (but not southerly) populations. Together, these results  
283 reveal that pollution from roads appears to be increasing the severity of edema in amphibians, and that  
284 this relatively unexplored consequence of roads imposes a potential fitness cost through its effect on  
285 locomotion.

286 Our gross morphological and histological findings indicate that fluid accumulation in the subcutis  
287 was indeed responsible for the edematous appearance of frogs. Several factors identified from the  
288 veterinary literature are known to cause subcutaneous edema, including fungal, bacterial, or viral  
289 infection, exposure to low solute water, and kidney diseases (reviewed by Pessier 2009). Interestingly,  
290 high salinity water might in some instances help prevent some diseases in amphibians (e.g., Stockwell et  
291 al. 2015). However, the consequences of salt runoff for disease susceptibility in amphibians are complex  
292 and not fully understood, with some studies suggesting that osmotic stress caused by salt might be  
293 detrimental to the survival of individuals in populations with ranavirus infections (Hall et al. 2020).  
294 Although we cannot completely rule out ranavirus as a factor, infected individuals typically present  
295 ulcerative and hemorrhagic syndromes in multiple tissues (Cunningham et al. 1996, Docherty et al. 2003),  
296 which we did not observe in the edematous animal dissected or among the animals scored for edema.

297 In our study, exposure to low solute water can definitively be ruled out as a possible factor, since  
298 animals presenting edema were more frequently those exposed to high solute water. Frogs have highly  
299 permeable skin and must osmoregulate in aquatic environments. For frogs in freshwater, the tendency is  
300 for water to move from the environment into the frog. Curiously, from an osmotic perspective, adding salt  
301 to freshwater should decrease the osmotic potential of the external environment relative to that of the  
302 frog. That is, by adding ions to the pond, water pressure exerted on frog skin decreases. In contrast, in  
303 unpolluted woodland ponds, external water pressure is higher than that found in polluted roadside ponds.  
304 Thus, based purely on osmotic pressure, there should be a greater tendency for woodland, not roadside,  
305 water to move into frogs. And yet we found edema was more severe in salty, roadside environments,  
306 pointing to dysfunction in osmoregulation. Therefore, it is likely that the culprit of edema is kidney  
307 disorder, potentially incurred from osmoregulatory stress from prior exposure to high salinity.

308           Increased edema severity in roadside ponds might also be linked to overwintering physiology.  
309   Beginning in fall as temperatures decline, wood frogs accumulate urea (Costanzo and Lee 2005) and  
310   continue to increase liver glycogen stores. During freezing, glycogen is metabolized into glucose  
311   (Costanzo and Lee 2013, Costanzo et al. 2015) and distributed to cells and organs. Water is moved to  
312   the coelomic cavity and lymph system (Lee et al. 1992), and cytosol moves osmotically to extracellular  
313   spaces. These physiological changes help prevent cells from freezing while permitting coelomic and  
314   subdural ice formation to occur with little damage to organs and tissue. Estimates indicate that up to  
315   about 2/3 of body water can become frozen in wood frogs during the winter (Layne Jr and Lee Jr 1987,  
316   Storey and Storey 1988, Costanzo and Lee 2013). Thawing in the spring can be rapid and appears to be  
317   a source of fleeting edema (Kling et al. 1994, Irwin et al. 1999) during which time there might be a lag  
318   period for water resorption from coelomic and subdural spaces, consistent with our histological and gross  
319   dissection findings. Although it is unclear why road proximity might increase severity of thaw-induced  
320   edema, conceivably, pollution might trigger a hyper-reactive freeze tolerance response and/or a reduced  
321   capacity for resorption. In which case, it is not surprising that we found elevated levels of glucose in the  
322   spring, suggesting either that edematous frogs have an amplified cryoprotective response (concentrating  
323   more glucose in their cells) and/or they metabolize glucose more slowly after thawing.

324           Regardless of whether edema is linked to winter physiology or a direct consequence of kidney  
325   disease, the severity we detected in roadside populations prompts consideration of what conditions in  
326   roadside environments increase edema severity. For instance, is edema exacerbated by the aquatic  
327   environment, terrestrial environment, or both? For adults in our study, one such exposure could have  
328   occurred during embryonic and larval stages (as wood frogs show strong natal site fidelity; Berven and  
329   Grudzien 1990) while another exposure could have occurred in adult stages but in prior breeding years  
330   (as wood frogs also show strong breeding site fidelity; Berven and Grudzien 1990). In either case, some  
331   degree of carry-over effect is implied. Exposure could also occur in terrestrial roadside habitats, for  
332   instance through consumption of saltier food items or exposure to saltier soils.

333           The edema we describe occurred in breeding frogs captured either on route to or soon after  
334   arriving in their breeding ponds. This means that for at least a subset of frogs, the onset of edema  
335   occurred before they were exposed to pond water. This finding indicates that edema sets in either during

336 the short migration from upland hibernacula to breeding ponds, or that frogs are edematous prior to  
337 migration. In late fall, frogs tend to choose overwintering sites close to their breeding ponds (O'Connor  
338 and Rittenhouse 2016), such that salt runoff exposure in the terrestrial environment might be  
339 exacerbating edema that forms naturally following the reversal of winter cryoprotection. Interestingly, we  
340 found no relation between age and edema severity or prevalence, suggesting that a single exposure to  
341 the roadside environment might be just as likely to generate edema as a history of adult breeding in  
342 roadside ponds.

343 Our study additionally suggests a significant impact of salt runoff exposure in the aquatic  
344 environment. We found higher edema severity with increased conductivity of the aquatic environment, a  
345 variable widely used to measure road salt pollution. In New England, like many temperate regions with  
346 cold winters, roadside ponds have become salinized due to runoff from road salt (Kaushal et al. 2005,  
347 Karraker et al. 2008, Brady 2012, Dugan et al. 2017). Although a variety of salts are used in de-icing  
348 practices, NaCl is the agent applied most abundantly, both in our study region and throughout the U.S.  
349 (Mullaney et al. 2009). Conductivity values in roadside ponds averaged 545  $\mu\text{S}/\text{cm}$ , and individual values  
350 ranged up to 2050  $\mu\text{S}/\text{cm}$ . Based on prior calibrations (G. Benoit unpublished data), we estimate these  
351 values correspond to 300 and 1128 mg/L of total NaCl, or 182 mg/L and 684 mg/L of  $\text{Cl}^-$ , respectively.  
352 Moreover, we found that frogs experimentally exposed to roadside water during breeding maintained  
353 mass on average while those exposed to woodland or spring water lost mass. We interpret this change in  
354 mass as being driven primarily by water gain or loss, thus representing a relative increase in water  
355 retention or uptake in roadside water, because frogs did not have access to food during this period.  
356 Saltier aquatic environments should result in frogs taking up more ions for osmoregulation (Greenwald  
357 1972), which could lead to higher water retention (Park and Do 2020) consistent with our findings (Fig. 2).  
358 For example, Park and Do (2020) found that exposure of black-spotted frogs (*Pelophylax nigromaculatus*)  
359 to about 9,400  $\mu\text{S}/\text{cm}$  resulted in increased blood electrolytes and that frogs became edematous. The  
360 authors attribute this effect to renal dysfunction resulting from the increase in electrolytes. Future studies  
361 would be required to disentangle the relative importance of pre- and post-metamorphosis exposure, as  
362 well as exposure through aquatic versus terrestrial environments.

363 Finally, we found that jumping performance was compromised by edema in the more northerly  
364 populations of Vermont and New Hampshire, but not those of Southern Connecticut. Here again,  
365 overwintering conditions might mediate this effect. For instance, in northern populations, more severe and  
366 longer winters should produce more intense cryoprotective physiological changes (Costanzo et al. 2015).  
367 This investment in cryoprotection might bear a cost to muscle performance needed for locomotion,  
368 consistent with our findings that Upper Valley frogs jumped just 68% the distance of Southern  
369 Connecticut frogs. Costanzo et al. (2015) report that muscle catabolism is an important component of  
370 freeze tolerance observed in northern (Alaska) wood frog populations but absent in Ohio populations, and  
371 that it results in skeletal muscle atrophy. The authors suggest that this mechanism is essential to increase  
372 nitrogen availability for urea production given the more extreme winters in Alaska. Conceivably, harsher  
373 winters in Vermont and New Hampshire induce this same mechanism and cause muscle atrophy that  
374 diminishes jumping performance. Also, the serous fat atrophy we found with severe edema suggests that  
375 edematous frogs consume more energy for cryoprotection. Given the importance of energy and  
376 locomotion during spring breeding, particularly in the context of road crossings and swimming  
377 performance during mating, these consequences could bear impacts on fitness components including  
378 survival and reproductive success and, therefore, on the viability of higher latitude populations.

379 In this study, we investigated possible causes and fitness consequences of increased edema  
380 severity, representing an amphibian population threat from roads and runoff pollution that has remained  
381 largely unexplored. Increased edema severity in wood frogs appears to be a wide-ranging phenomenon  
382 in road-adjacent habitats, driven by road salt pollution. Given the regional distribution of edema reported  
383 here, we expect that this phenomenon likely affects wood frogs across much of their range, although the  
384 consequences of edema might be most severe for populations experiencing more intense winters.  
385 Interestingly, northern areas where winters are more intense tend to use more road salt. Thus, the  
386 presence of these multiple, correlated stressors suggests that wood frogs in more northerly populations  
387 might be both most likely to experience higher edema severity near roads and locomotor consequences  
388 as a result. Many important questions remain about the mechanisms and consequences of severe edema  
389 in roadside wood frogs. Indeed, while road salt is a prevalent contaminant and almost certainly the most  
390 common pollutant by mass in these ponds, other contaminants could be contributing to edema, such as

391 heavy metals and aromatic hydrocarbons, and such effects might be interactive. Identifying the causes of  
392 severe edema and its impacts on populations should guide future investigations.

393

#### 394 **Acknowledgements**

395 This work was supported by Mianus River Gorge Preserve, Elm City Innovation Collaborative, Yale  
396 Institute for Biospheric Studies, EEES Graduate fellowship and Cramer funds, Guarini School of  
397 Graduate and Advanced Studies McCulloch Fellowship, CAPES graduate fellowship (SwB 13442/13-9),  
398 and the National Science Foundation (DEB #1011335, DEB #1655092). We thank D. Skelly for project  
399 advice, and J. Peterman and S. Rodrigues for help in the field and lab. We are grateful to the many  
400 private land owners and public land managers who allowed us to work on their lands.

401



402 **Literature Cited**

- 403 Albecker, M. A., and M. W. McCoy. 2017. Adaptive responses to salinity stress across multiple life stages  
404 in anuran amphibians. *Frontiers in zoology* **14**:40-40.
- 405 Berven, K. A. 2009. Density dependence in the terrestrial stage of wood frogs: evidence from a 21-year  
406 population study. *Copeia* **2009**:328-338.
- 407 Brady, S. P. 2012. Road to evolution? Local adaptation to road adjacency in an amphibian (*Ambystoma*  
408 *maculatum*). *Scientific Reports* **2**.
- 409 Brady, S. P. 2013. Microgeographic maladaptive performance and deme depression in response to roads  
410 and runoff. *PeerJ* **1**:e163.
- 411 Brady, S. P. 2017. Environmental exposure does not explain putative maladaptation in road-adjacent  
412 populations. *Oecologia* **184**:931-942.
- 413 Brady, S. P., and J. L. Richardson. 2017. Road ecology: shifting gears toward evolutionary perspectives.  
414 *Frontiers in Ecology and the Environment* **15**:91-98.
- 415 Brady, S. P., J. L. Richardson, and B. K. Kunz. 2017. Incorporating evolutionary insights to improve  
416 ecotoxicology for freshwater species. *Evolutionary Applications* **10**:829-838.
- 417 Brady, S. P., F. J. Zamora-Camacho, F. A. Eriksson, D. Goedert, M. Comas, and R. Calsbeek. 2019.  
418 Fitter frogs from polluted ponds: The complex impacts of human-altered environments.  
419 *Evolutionary Applications* **12**:1360-1370.
- 420 Cardinale, B. J., J. E. Duffy, A. Gonzalez, D. U. Hooper, C. Perrings, P. Venail, A. Narwani, G. M. Mace,  
421 D. Tilman, and D. A. Wardle. 2012. Biodiversity loss and its impact on humanity. *Nature* **486**:59-  
422 67.

- 423 Ceballos, G., P. R. Ehrlich, A. D. Barnosky, A. García, R. M. Pringle, and T. M. Palmer. 2015. Accelerated  
424 modern human-induced species losses: Entering the sixth mass extinction. *Science Advances*  
425 **1**:e1400253.
- 426 Central Intelligence Agency. 2013. *The World Factbook 2012-13*. Central Intelligence Agency.
- 427 Christensen, R. H. B. 2019. *Regression Models for Ordinal Data* [R package ordinal version 2019.12-10].
- 428 Corsi, S., D. Graczyk, S. Geis, N. Booth, and K. Richards. 2010. A fresh look at road salt: aquatic toxicity  
429 and water-quality impacts on local, regional, and national scales. *Environmental Science &*  
430 *Technology* **44**:7376-7382.
- 431 Costanzo, J. P., and R. E. Lee. 2005. Cryoprotection by urea in a terrestrially hibernating frog. *Journal of*  
432 *Experimental Biology* **208**:4079-4089.
- 433 Costanzo, J. P., and R. E. Lee. 2013. Avoidance and tolerance of freezing in ectothermic vertebrates.  
434 *Journal of Experimental Biology* **216**:1961-1967.
- 435 Costanzo, J. P., A. M. Reynolds, M. C. F. do Amaral, A. J. Rosendale, and R. E. Lee Jr. 2015.  
436 Cryoprotectants and extreme freeze tolerance in a subarctic population of the wood frog. *PLoS*  
437 *ONE* **10**:e0117234.
- 438 Cunningham, A., T. S. Langton, P. Bennett, J. Lewin, S. Drury, R. Gough, and S. Macgregor. 1996.  
439 Pathological and microbiological findings from incidents of unusual mortality of the common frog  
440 (*Rana temporaria*). *Philosophical Transactions of the Royal Society of London. Series B:*  
441 *Biological Sciences* **351**:1539-1557.
- 442 Dananay, K. L., K. L. Krynak, T. J. Krynak, and M. F. Benard. 2015. Legacy of road salt: Apparent  
443 positive larval effects counteracted by negative postmetamorphic effects in wood frogs.  
444 *Environmental Toxicology and Chemistry* **34**:2417-2424.

- 445 Denoël, M., M. Bichot, G. F. Ficetola, J. Delcourt, M. Yliff, P. Kestemont, and P. Poncin. 2010.  
446 Cumulative effects of road de-icing salt on amphibian behavior. *Aquatic Toxicology* **99**:275-280.
- 447 Docherty, D. E., C. U. Meteyer, J. Wang, J. Mao, S. T. Case, and V. G. Chinchar. 2003. Diagnostic and  
448 molecular evaluation of three iridovirus-associated salamander mortality events. *Journal of*  
449 *Wildlife Diseases* **39**:556-566.
- 450 Dugan, H. A., S. L. Bartlett, S. M. Burke, J. P. Doubek, F. E. Krivak-Tetley, N. K. Skaff, J. C. Summers, K.  
451 J. Farrell, I. M. McCullough, A. M. Morales-Williams, D. C. Roberts, Z. Ouyang, F. Scordo, P. C.  
452 Hanson, and K. C. Weathers. 2017. Salting our freshwater lakes. *Proceedings of the National*  
453 *Academy of Sciences*:201620211.
- 454 Dulac, J. 2013. Global land transport infrastructure requirements. Paris: International Energy Agency  
455 **20**:2014.
- 456 Emer, C., M. Galetti, M. A. Pizo, P. Jordano, and M. Verdú. 2019. Defaunation precipitates the extinction  
457 of evolutionarily distinct interactions in the Anthropocene. *Science Advances* **5**:eaav6699.
- 458 Fahrig, L., and T. Rytwinski. 2009. Effects of roads on animal abundance: an empirical review and  
459 synthesis. *Ecology and Society* **14**.
- 460 Forman, R. T. T., and R. D. Deblinger. 2000. The ecological road-effect zone of a Massachusetts (USA)  
461 suburban highway. *Conservation Biology* **14**.
- 462 Forzán, M. J., R. V. Vanderstichel, C. T. Ogbuah, J. R. Barta, and T. G. Smith. 2012. Blood collection  
463 from the facial (maxillary)/musculo-cutaneous vein in true frogs (family Ranidae). *J Wildl Dis*  
464 **48**:176-180.
- 465 Glista, D. J., T. L. DeVault, and J. A. DeWoody. 2008. Vertebrate road mortality predominantly impacts  
466 amphibians. *Herpetological conservation and Biology* **3**:77-87.

- 467 Gordon, M. S., and V. A. Tucker. 1965. Osmotic regulation in the tadpoles of the crab-eating frog (*Rana*  
468 *cancrivora*). *Journal of Experimental Biology* **42**:437-445.
- 469 Grant, E. H. C., D. A. Miller, and E. Muths. 2020. A Synthesis of Evidence of Drivers of Amphibian  
470 Declines. *Herpetologica*.
- 471 Green, D. M., M. J. Lannoo, D. Lesbarrères, and E. Muths. 2020. Amphibian population declines: 30  
472 years of progress in confronting a complex problem. *Herpetologica* **76**:97-100.
- 473 Green, D. M., L. A. Weir, G. S. Casper, and M. J. Lannoo. 2014. North American amphibians: distribution  
474 and diversity. Univ of California Press.
- 475 Greenwald, L. 1972. Sodium Balance in Amphibians from Different Habitats. *Physiological Zoology*  
476 **45**:229-237.
- 477 Hadfield, C. A., and B. R. Whitaker. 2005. Amphibian emergency medicine and care. Pages 79-89 *in*  
478 *Seminars in Avian and Exotic Pet Medicine*. Elsevier.
- 479 Hall, E. M., S. P. Brady, N. M. Mattheus, R. L. Earley, M. Diamond, and E. J. Crespi. 2017. Physiological  
480 consequences of exposure to salinized roadside ponds on wood frog larvae and adults. *Biological*  
481 *Conservation* **209**:98-106.
- 482 Hall, E. M., J. L. Brunner, B. Hutzenbiler, and E. J. Crespi. 2020. Salinity stress increases the severity of  
483 ranavirus epidemics in amphibian populations. *Proceedings of the Royal Society B: Biological*  
484 *Sciences* **287**:20200062.
- 485 Huber, M., A. Welker, and B. Helmreich. 2016. Critical review of heavy metal pollution of traffic area  
486 runoff: Occurrence, influencing factors, and partitioning. *Science of the Total Environment*  
487 **541**:895-919.
- 488 Irwin, J. T., J. P. Costanzo, and J. Lee, Richard E. 1999. Terrestrial hibernation in the northern cricket  
489 frog, *Acris crepitans*. *Canadian Journal of Zoology* **77**:1240-1246.

- 490 Karraker, N. E., J. P. Gibbs, and J. R. Vonesh. 2008. Impacts of road deicing salt on the demography of  
491 vernal pool-breeding amphibians. *Ecological Applications* **18**:724-734.
- 492 Karraker, N. E., and G. R. Ruthig. 2009. Effect of road deicing salt on the susceptibility of amphibian  
493 embryos to infection by water molds. *Environmental Research* **109**.
- 494 Kaushal, S. S., P. M. Groffman, G. E. Likens, K. T. Belt, W. P. Stack, V. R. Kelly, L. E. Band, and G. T.  
495 Fisher. 2005. Increased salinization of fresh water in the northeastern United States. *Proceedings*  
496 *of the National Academy of Sciences of the United States of America* **102**:13517-13520.
- 497 Kaushal, S. S., G. E. Likens, M. L. Pace, R. M. Utz, S. Haq, J. Gorman, and M. Grese. 2018. Freshwater  
498 salinization syndrome on a continental scale. *Proceedings of the National Academy of Sciences*  
499 **115**:E574-E583.
- 500 Kling, K., J. Costanzo, and R. Lee. 1994. Post-freeze recovery of peripheral nerve function in the freeze-  
501 tolerant wood frog, *Rana sylvatica*. *Journal of Comparative Physiology B* **164**:316-320.
- 502 Kuznetsova, A., P. B. Brockhoff, and R. H. Christensen. 2017. ImerTest package: tests in linear mixed  
503 effects models. *Journal of statistical software* **82**:1-26.
- 504 Lalo, J. 1987. The problem of road kill. *American forests (USA)*.
- 505 Layne Jr, J. R., and R. E. Lee Jr. 1987. Freeze tolerance and the dynamics of ice formation in wood frogs  
506 (*Rana sylvatica*) from southern Ohio. *Canadian Journal of Zoology* **65**:2062-2065.
- 507 Lee, R. E., J. P. Costanzo, E. C. Davidson, and J. R. Layne Jr. 1992. Dynamics of body water during  
508 freezing and thawing in a freeze-tolerant frog (*Rana sylvatica*). *Journal of Thermal Biology*  
509 **17**:263-266.
- 510 Leigh, D. M., A. P. Hendry, E. Vázquez-Domínguez, and V. L. Friesen. 2019. Estimated six per cent loss  
511 of genetic variation in wild populations since the industrial revolution. *Evolutionary Applications*  
512 **12**:1505-1512.

- 513 Lenth, R., H. Singmann, J. Love, P. Buerkner, and M. Herve. 2018. Emmeans: Estimated marginal  
514 means, aka least-squares means. R package version 1:3.
- 515 Marsalek, J., Q. Rochfort, B. Brownlee, T. Mayer, and M. Servos. 1999. An exploratory study of urban  
516 runoff toxicity. *Water science and technology* **39**:33-39.
- 517 Martof, B. S., and R. L. Humphries. 1959. Geographic Variation in the Wood Frog *Rana sylvatica*.  
518 *American Midland Naturalist* **61**:350-389.
- 519 McIntyre, J. K., J. I. Lundin, J. R. Cameron, M. I. Chow, J. W. Davis, J. P. Incardona, and N. L. Scholz.  
520 2018. Interspecies variation in the susceptibility of adult Pacific salmon to toxic urban stormwater  
521 runoff. *Environmental Pollution* **238**:196-203.
- 522 Miller, D., M. Gray, and A. Storfer. 2011. Ecopathology of ranaviruses infecting amphibians. *Viruses*  
523 **3**:2351-2373.
- 524 Mortensen, D. A., E. S. Rauschert, A. N. Nord, and B. P. Jones. 2009. Forest roads facilitate the spread  
525 of invasive plants. *Invasive Plant Science and Management* **2**:191-199.
- 526 Mullaney, J. R., D. L. Lorenz, and A. D. Arntson. 2009. Chloride in groundwater and surface water in  
527 areas underlain by the glacial aquifer system, northern United States. U.S. Geological Survey  
528 Scientific Investigations Report 2009–5086.
- 529 O'Connor, J. H., and T. A. Rittenhouse. 2016. Snow cover and late fall movement influence wood frog  
530 survival during an unusually cold winter. *Oecologia* **181**:635-644.
- 531 Park, J. K., and Y. Do. 2020. Physiological response of *Pelophylax nigromaculatus* adults to salinity  
532 exposure. *Animals (Basel)* **10**: 1698.
- 533 Pessier, A. P. 2009. Edematous frogs, urinary tract disease, and disorders of fluid balance in amphibians.  
534 *Journal of Exotic Pet Medicine* **18**:4-13.

- 535 Reed, R. A., J. Johnson-Barnard, and W. L. Baker. 1996. Contribution of roads to forest fragmentation in  
536 the Rocky Mountains. *Conservation Biology* **10**:1098-1106.
- 537 Riley, S. P., J. P. Pollinger, R. M. Sauvajot, E. C. York, C. Bromley, T. K. Fuller, and R. K. Wayne. 2006.  
538 FAST-TRACK: A southern California freeway is a physical and social barrier to gene flow in  
539 carnivores. *Molecular Ecology* **15**:1733-1741.
- 540 Rosenberg, K. V., A. M. Dokter, P. J. Blancher, J. R. Sauer, A. C. Smith, P. A. Smith, J. C. Stanton, A.  
541 Panjabi, L. Helft, M. Parr, and P. P. Marra. 2019. Decline of the North American avifauna.  
542 *Science* **366**:120.
- 543 Sanzo, D., and S. J. Hecnar. 2006. Effects of road de-icing salt (NaCl) on larval wood frogs (*Rana*  
544 *sylvatica*). *Environmental Pollution* **140**.
- 545 Shepard, D. B., A. R. Kuhns, M. J. Dreslik, and C. A. Phillips. 2008. Roads as barriers to animal  
546 movement in fragmented landscapes. *Animal Conservation* **11**:288-296.
- 547 Stockwell, M., J. Clulow, and M. Mahony. 2015. Evidence of a salt refuge: chytrid infection loads are  
548 suppressed in hosts exposed to salt. *Oecologia* **177**:901-910.
- 549 Storey, K. B., and J. M. Storey. 1988. Freeze tolerance in animals. *Physiological Reviews* **68**:27-84.
- 550 Symstad, A. J., D. Tilman, J. Willson, and J. M. Knops. 1998. Species loss and ecosystem functioning:  
551 effects of species identity and community composition. *Oikos*:389-397.
- 552 Tang, J. Y., R. Aryal, A. Deletic, W. Gernjak, E. Glenn, D. McCarthy, and B. I. Escher. 2013. Toxicity  
553 characterization of urban stormwater with bioanalytical tools. *Water Research* **47**:5594-5606.
- 554 Trombulak, S. C., and C. A. Frissell. 2000. Review of ecological effects of roads on terrestrial and aquatic  
555 communities. *Conservation Biology* **14**:18-30.
- 556 Uchiyama, M., T. Murakami, and H. Yoshizawa. 1990. Notes on the development of the crab-eating frog,  
557 *Rana cancrivora*. *Zoological Science* **7**:p73-78.

558 Urban, M. C. 2006. Road facilitation of trematode infections in snails of northern Alaska. Conservation  
559 Biology **20**:1143-1149.  
560  
561



562 **Figures**

563 **Figure 1. Study sites, edema prevalence, and jump performance.** Panel A: Edema was scored in  
564 frogs from 38 ponds located within three regions in New England, from south to north: Southern  
565 Connecticut, Northeastern Connecticut, and the Upper Valley in Vermont/New Hampshire. Locations of  
566 roadside ponds (filled circles) and woodland ponds (open circles) are shown; points were jittered to  
567 reduce overlap. Panel B: Edema increased with increasing conductivity (a proxy for road salt). Diamonds  
568 ( $\pm 1$  SE) represent pond-level average edema. Circles show individual data points, jittered to reduce  
569 overlap. Regression line was estimated with a linear model of pond-level averages for both edema and  
570 conductivity. Panel C: Edema was more severe in roadside ponds. Each point represents edema for a  
571 unique frog. Points are jittered vertically and horizontally to reduce overlap. Violin plots show density  
572 distribution. Means ( $\pm 95\%$  CI) for each population type are indicated by open diamonds. Panel D: Edema  
573 compromised jumping performance for (right) more northerly ( $P = 0.016$ ) but not (left) more southerly  
574 populations ( $P = 0.479$ ). Regression lines represent fixed effect of population type from mixed model.  
575

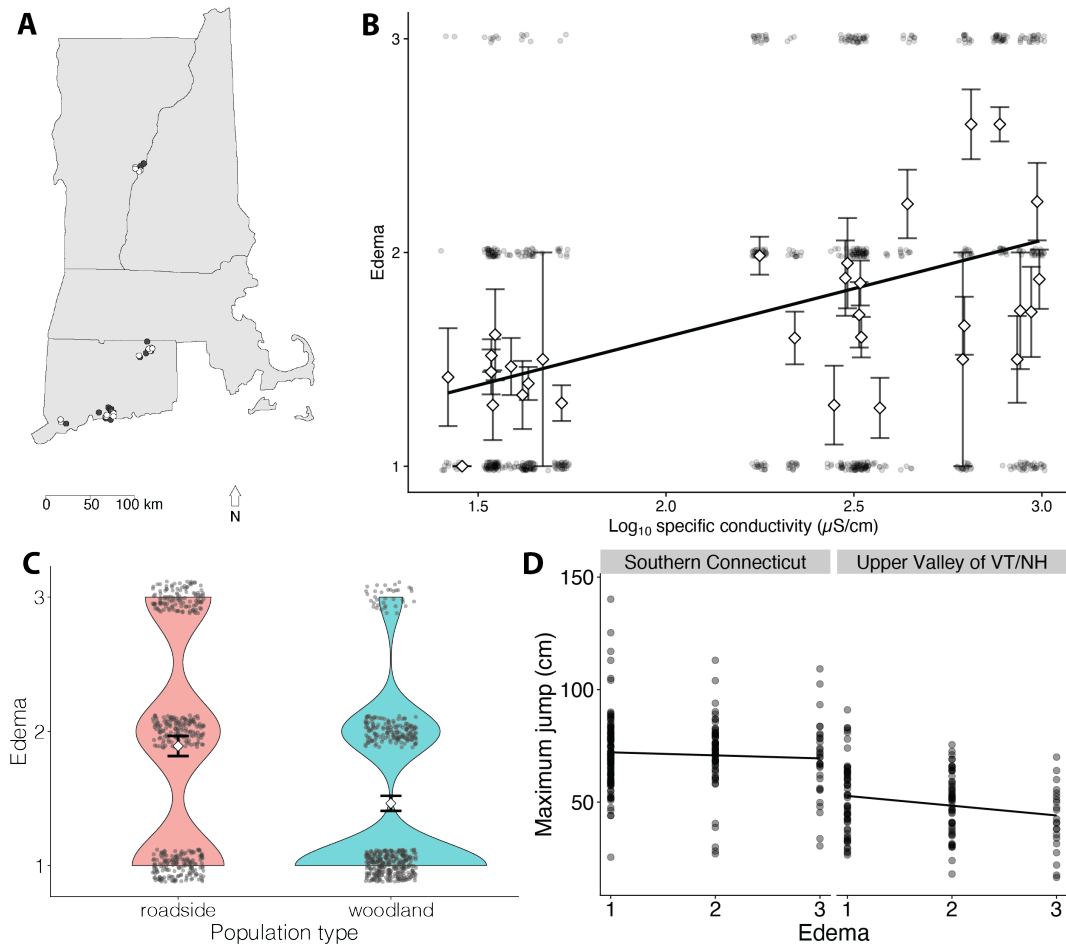

576

577 **Figure 2. Edema and water balance.** (A) On gross dissection of the edematous frog (top), edema fluid  
578 rapidly dissipated from the subcutis (not visible), and was evident to a much lesser degree in the coelomic  
579 cavity. Testes were well developed. Marked subcutaneous edema is evident in an edematous frog  
580 (bottom left) compared to a non-edematous frog (bottom right). Bars = 1cm. (B) On histology, the grossly  
581 edematous animal exhibited subcutaneous edema (asterisk, top left) not evident in the non-edematous  
582 animal (asterisk, top right). Marked serous atrophy of fat was evident in bone marrow of the edematous  
583 animal (asterisk, bottom left) in comparison to non-edematous animals with greater retention of intact  
584 adipocytes within bone marrow (asterisk, bottom right). Bars = 50 $\mu$ m, hematoxylin and eosin. (C) Change  
585 in adult male mass relative to body size (i.e. body condition index, or 'BCI') during a controlled breeding  
586 experiment is shown for different exposure waters. Mass was measured before and after breeding. Delta  
587 BCI of 1 (dashed line) indicates no change. Experimental exposure to (far left) roadside pond water  
588 caused frogs from roadside ponds gain or maintain water on average during the breeding period. In  
589 contrast, on average, frogs from woodland ponds exposed to (left center) woodland water lost mass.  
590 Similarly, individuals exposed to spring water – whether from (right center) roadside ponds or (far right)  
591 woodland ponds – lost mass on average. Raw data are shown as gray circles. Violin plots and boxplots  
592 are overlain. White diamonds and error bars represent estimated marginal means and corresponding  
593 95% confidence intervals.

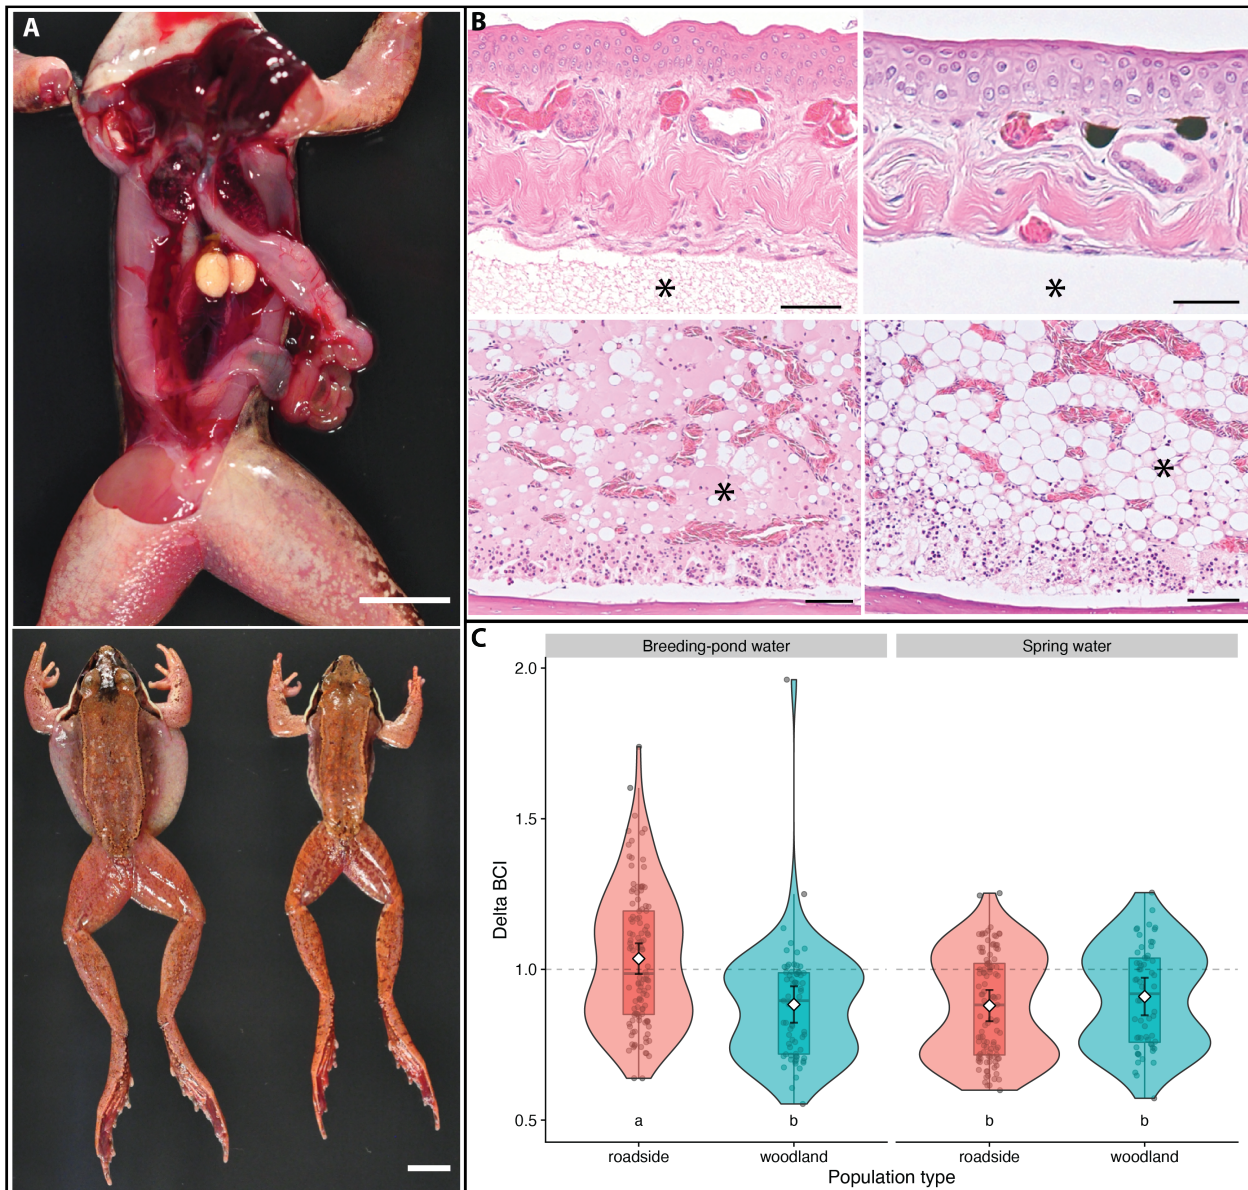

594
